# Supplementary material for: Endothelial PERK-ATF4-JAG1 axis activated by T-ALL remodels bone marrow vascular niche
Source: Theranostics. 2022 Mar 21;12(6):2894–907. doi: 10.7150/thno.67710 (PMC8965499; doi:10.7150/thno.67710)
Supplement: Supplementary file 1 — Supplementary figures. [file thnov12p2894s1.pdf]

## Supplemental figure legends and figures

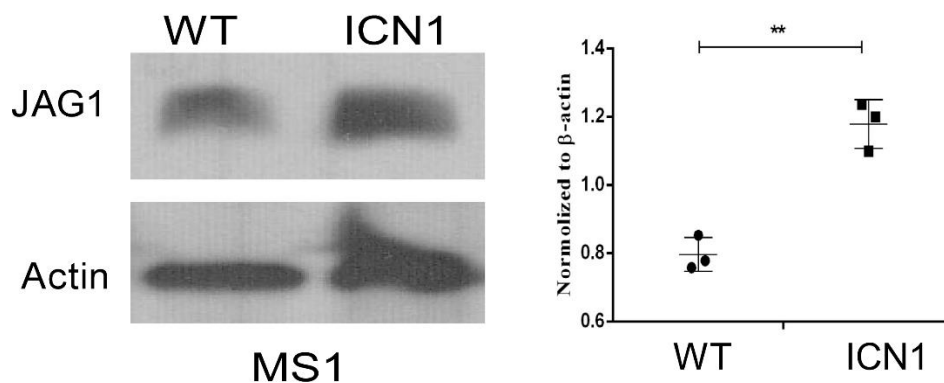

**Fig S1. Up-regulation of JAG1 in MS1 cells.** MS1 cells were co-cultured with control or ICN1 cells ( $1.5 \times 10^6$ ) for 24h. Representative western blot (left) with anti-JAG1. Quantification of JAG1 expression normalized to  $\beta$ -actin from 3 similar experiments (right). Student t test was performed; \*\*p<0.01

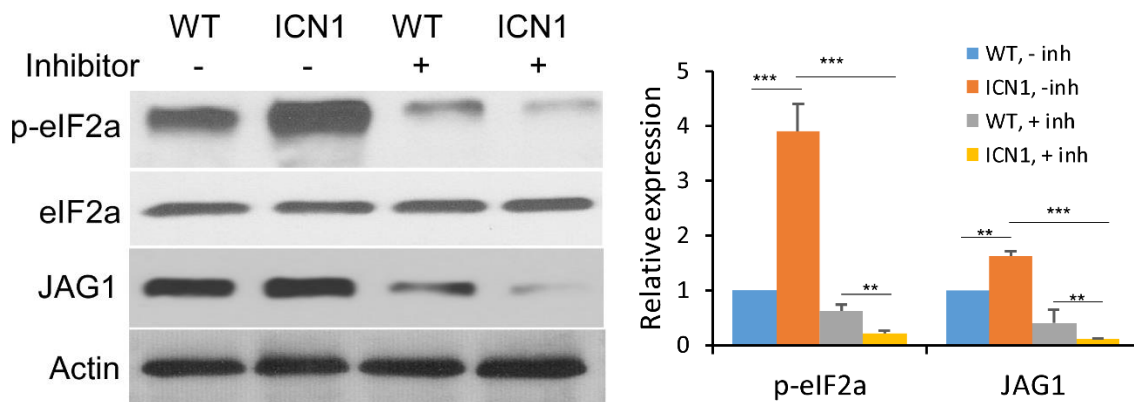

**Figure S2. PERK and JAG1 Activation induced in MS1 by ICN1.** MS1 cells were co-cultured with control or ICN1 cells ( $1.5 \times 10^6$ ) for 24h in the presence or absence (GSK control medium) of the PERK inhibitor GSK2606414 (GSK; 1  $\mu$ M). Representative western blots using antibodies targeting p-eIF2a, eIF2a, JAG1, and actin were shown of 3 similar experiments.

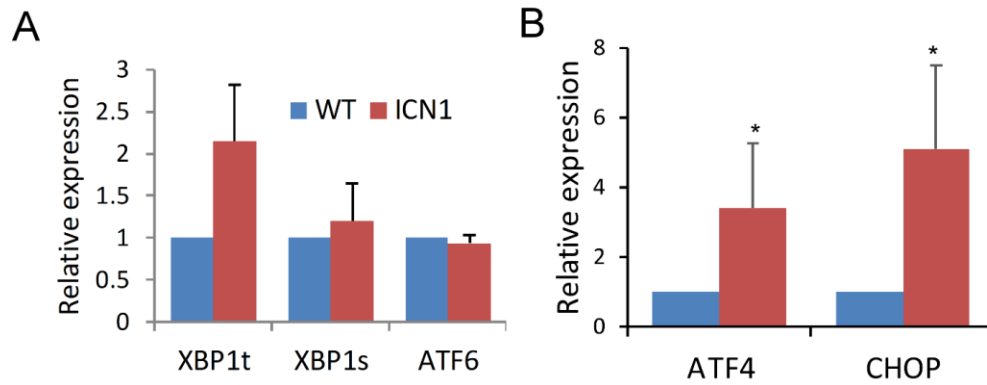

**Fig S3. Endothelial UPR effector regulation by ICN1.** BMECs were co-cultured with control or ICN1 cells ( $1.5 \times 10^6$ ) for 24h. qRT-PCR of EC expressions of the UPR effectors (total XBP1 (XBP1t), spliced XBP1 (XBP1s) and ATF6) (A) and ATF4 & CHOP (B) were standardized for beta-actin and expressed as fold changes relative to those in EC co-cultured with control marrow cells (n=6/group from 2 experiments). Student t test was performed; \*p<0.05

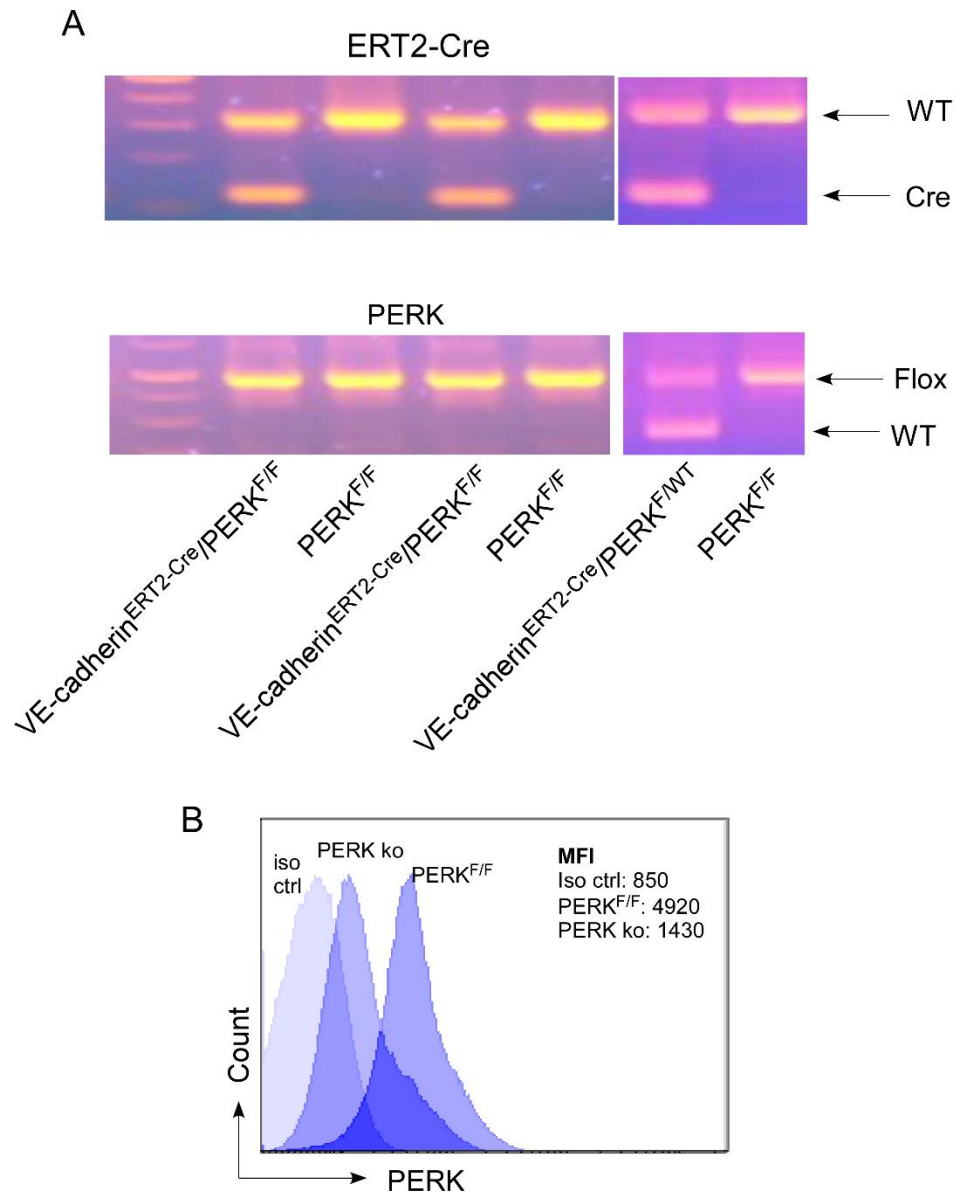

**Fig S4. Genotyping of VE-cadherin<sup>ERT2-Cre</sup>/PERK<sup>F/F</sup> mice and control mice.** (A) Genotyping of ERT2-cre and PERK floxed allele in VE-cadherin<sup>ERT2-Cre</sup>/PERK<sup>F/F</sup> and PERK<sup>F/F</sup> mice. (B) Detection of PERK expression (BS-2469R; Bioss Antibodies Inc., Woburn, MA) by flow bone marrow ECs (gated on CD45<sup>-</sup>TER119<sup>-</sup>CD31<sup>+</sup> cells) in PERK knockout (ko) (VE-cadherin<sup>ERT2-Cre</sup>/PERK<sup>F/F</sup>) and PERK<sup>F/F</sup> mice.

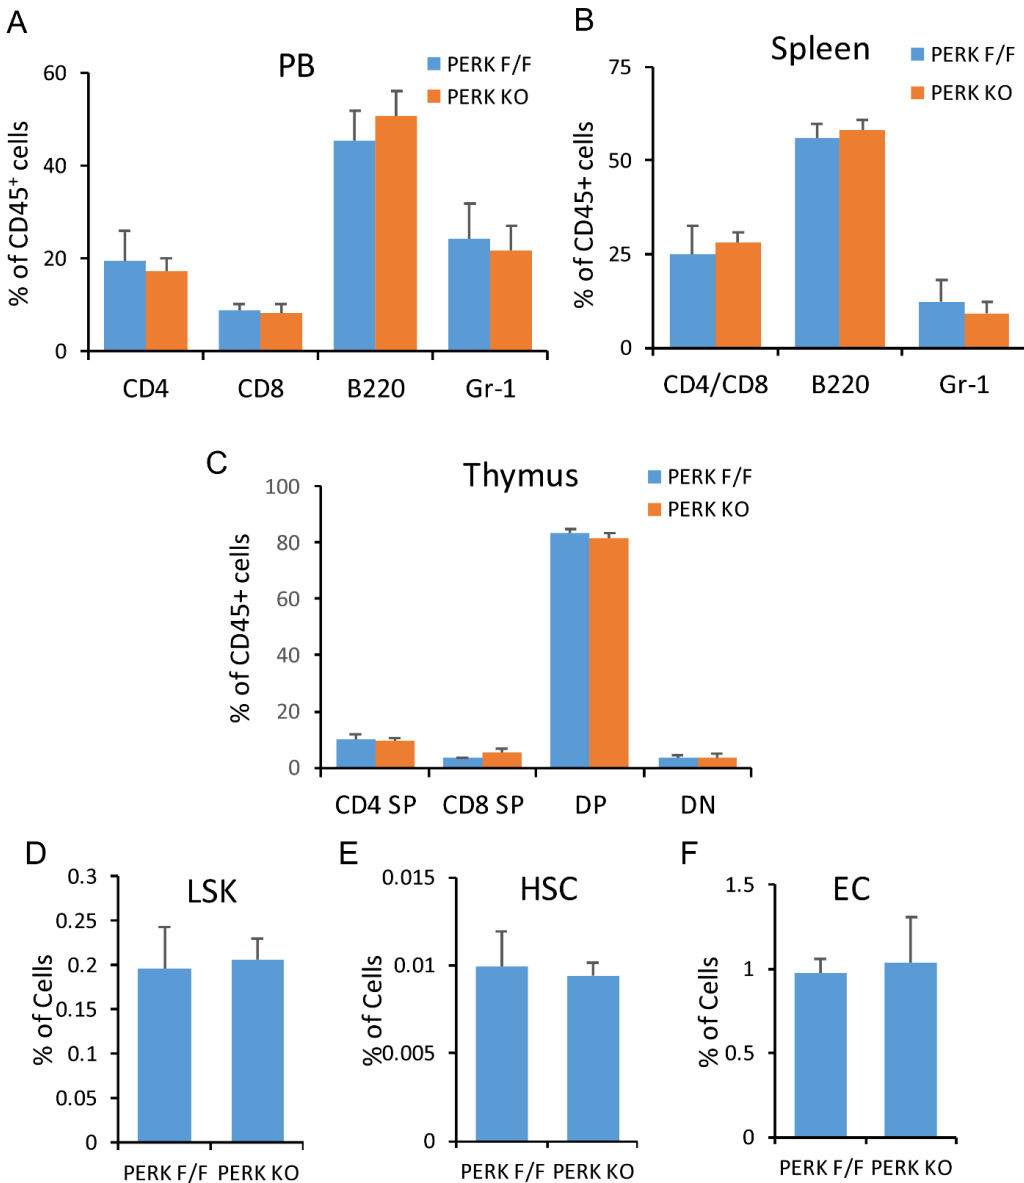

**Fig S5. PERK deletion in endothelial cells had no significant effects on homeostatic hematopoiesis.** One month after PERK deletion by tamoxifen, peripheral blood (PB) (A), spleen (B), thymus (C) and bone marrow (D) were analyzed for PB and spleen T cells (CD4+ or CD8+), B cells (B220+), granulocytes (Gr-1+); thymus CD4+ (CD4 SP), CD8+ (CD8+ SP), CD4+CD8+ (DP), and CD4-CD8- (DN); bone marrow HSPC (lin-Sca1+c-kit+; LSK), HSC (CD4-Flt3-CD150+CD48-LSK), and endothelial cells (CD45-TER119-CD31+; EC). Data pooled from 8 mice of each genotype and expressed as mean  $\pm$  SD. Student t test was performed

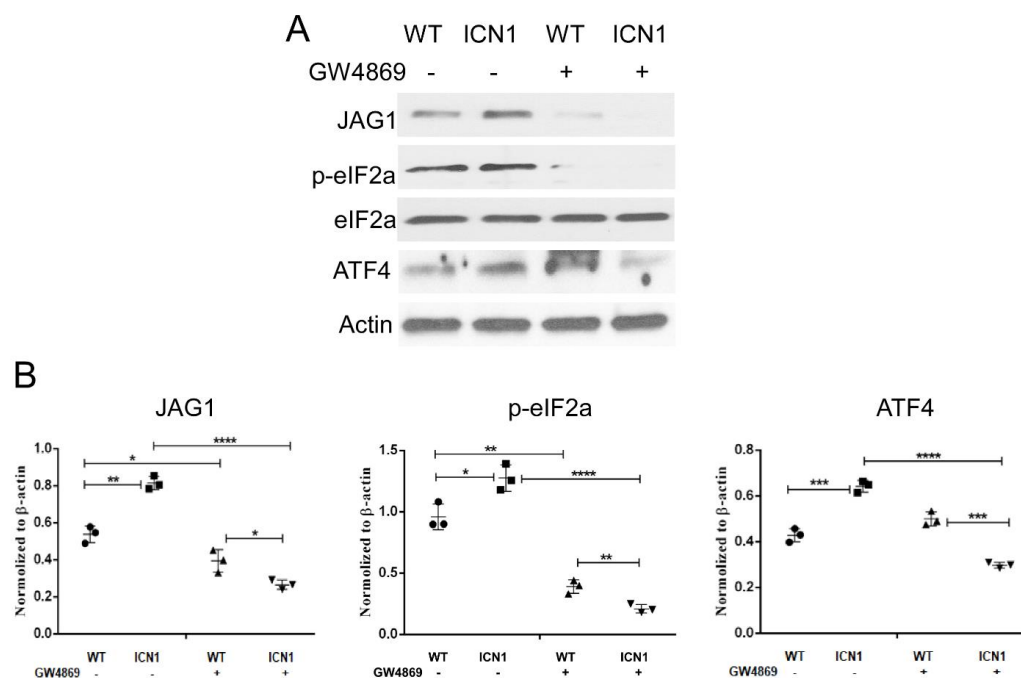

**Fig S6. Inhibition of SEV biogenesis/release blocked leukemia induced JAG1 up-regulation.** (A) Representative blots of BMECs lysates after cultured for 24 h with control or ICN1 cells in the absence or the presence of GW4869 (20  $\mu$ mol/L). (B) Quantification of total eIF2a, p-eIF2a, ATF4, and JAG1 expression were normalized to  $\beta$ -actin. Data shown in B was mean  $\pm$  SD (n=3). Student t test was performed; \*p<0.05, \*\* p<0.01, \*\*\* p<0.001, \*\*\*\* p<0.0001

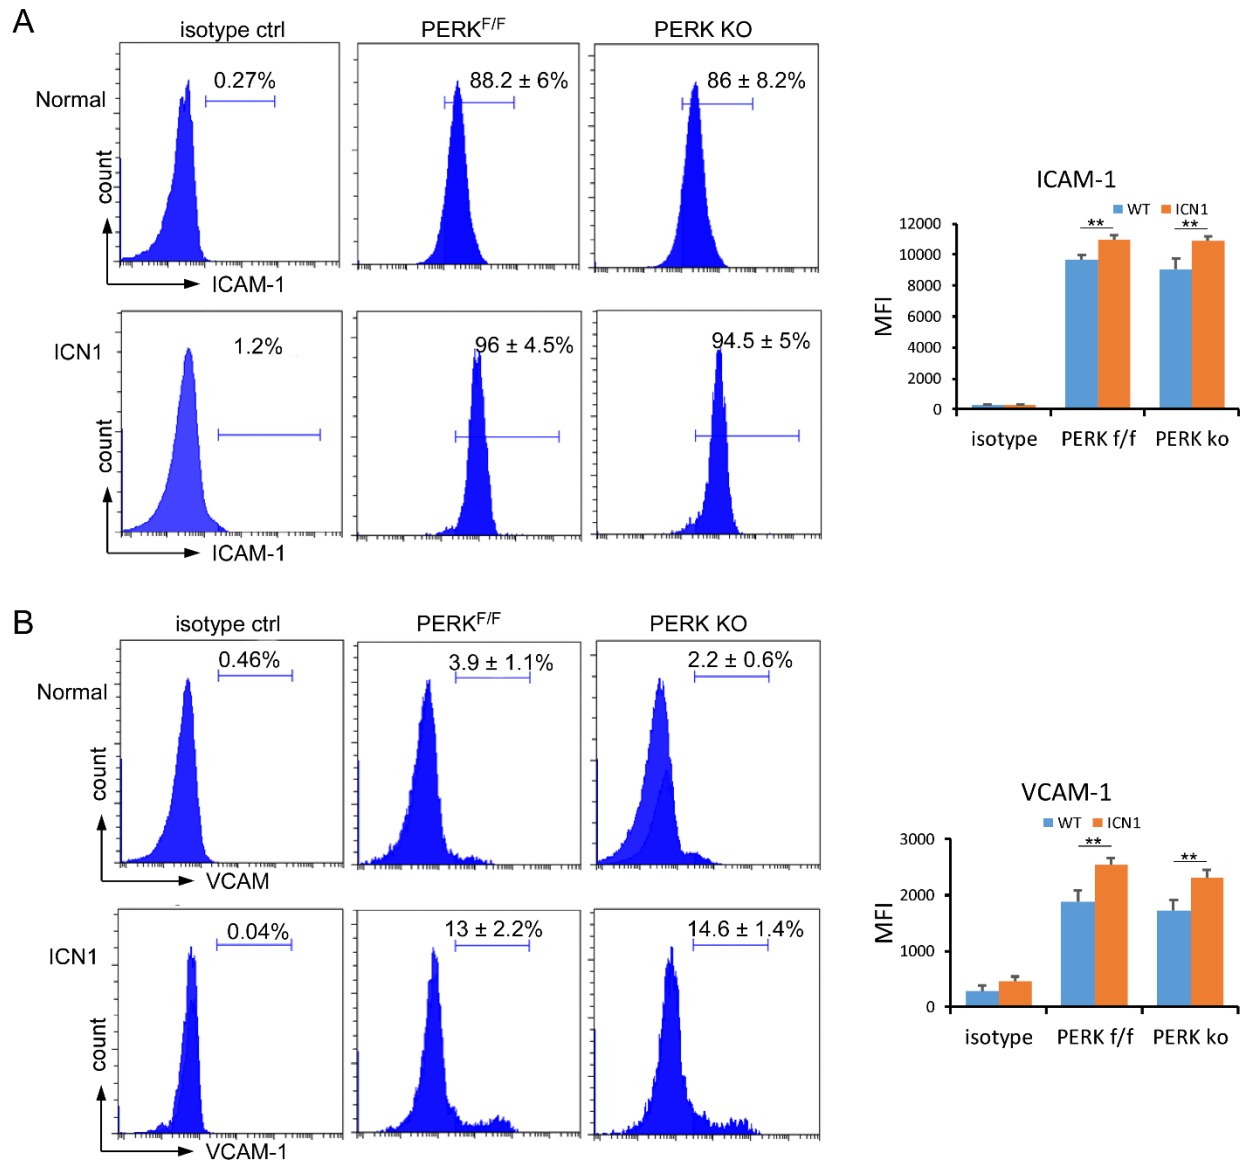

**Fig S7. ICAM-1 and VCAM-1 expression levels in the bone marrow endothelial cells.** (A-B) Representative FACS profile of bone marrow EC (Lin<sup>-</sup>TER119<sup>+</sup>CD31<sup>+</sup>) expression of ICAM-1 (A) and VCAM (B) in normal mice and mice engrafted with ICN1 T-ALL cells. Leukemia burden was >85% in all leukemia developing mice. Data shown are mean ± SD (n=3/group).

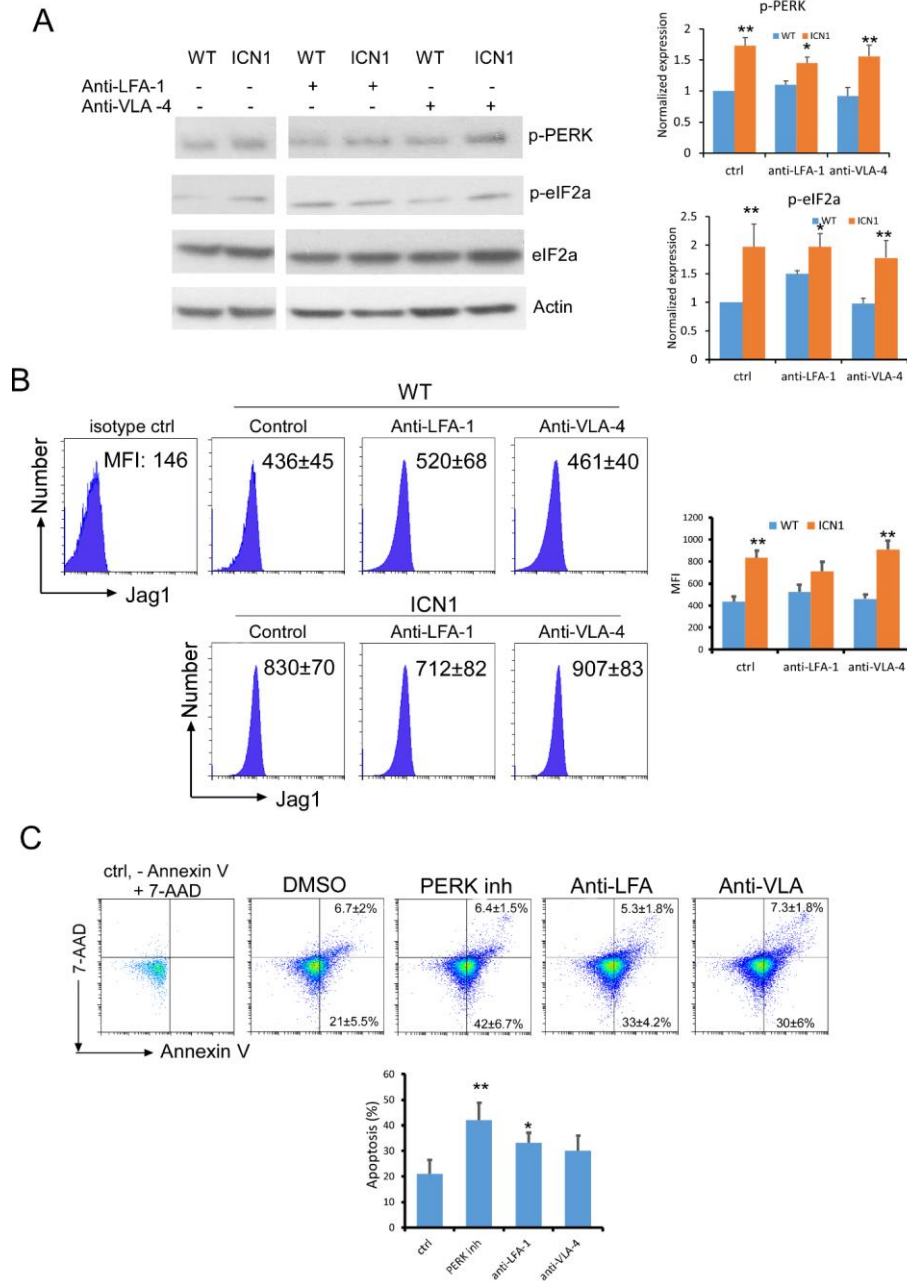

**Fig S8. LFA-1/ICAM-1 may contribute to PERK and JAG1 activation in endothelial cells.** (A-B) Representative blots of PERK and eIF2a activation in EC lysates (A) and flow profile of JAG1 expression (B) after cultured for 24 h with control or ICN1 cells in the absence or the presence of anti-LFA-1 (10 µg/mL) (BE0005-1; BioXCell) or anti-VLA-4 (10 µg/mL) (BE0071; BioXCell). Quantification of p-PERK (MA5-15033; Invitrogen) and p-eIF2a was normalized to β-actin. The expression of WT p-PERK or p-eIF2a to β-actin was set as 1. (C) Apoptotic ICN1 cells (annexin-V<sup>+</sup>7-AAD<sup>-</sup>) were assessed by annexin-V staining after co-culture with ECs for 24 h with DMSO (ctrl), PERK inhibitor, anti-LFA-1, or anti-VLA-4. Data shown are mean ± SD (n=3/group). Student t test was performed; \*p<0.05, \*\* p<0.01.
